# Supplementary material for: Locomotion of Slope Geohazards Responding to Climate Change in the Qinghai-Tibetan Plateau and Its Adjacent Regions
Source: MDPI journal article supplement (doi:10.3390/su131910488), 2021-09-21
Supplement: s1 [file s1]

*Supplementary*

# Locomotion of Slope Geohazards Responding to Climate Change in the Qinghai-Tibetan Plateau and Its Adjacent Regions

Yiru Jia <sup>1,2</sup>, Jifu Liu <sup>1,2</sup>, Lanlan Guo <sup>2,3,\*</sup>, Zhifei Deng <sup>2</sup>, Jiaoyang Li <sup>2</sup> and Hao Zheng <sup>2</sup>

<sup>1</sup> Key Laboratory of Environmental Change and Natural Disaster, Academy of Disaster Reduction and Emergence Management, Faculty of Geographical Science, Beijing Normal University, Beijing 100875, China; yirujia@mail.bnu.edu.cn (Y.J.); liujifu@bnu.edu.cn (J.L.)

<sup>2</sup> Faculty of Geographical Science, Beijing Normal University, Beijing 100875, China; 201531480026@mail.bnu.edu.cn (Z.D.); 201821051182@mail.bnu.edu.cn (J.L.); zhenghao@mail.bnu.edu.cn (H.Z.)

<sup>3</sup> State Key Laboratory of Earth Surface Processes and Resource Ecology, Beijing Normal University, Beijing 100875, China

\* Correspondence: guolanlan@bnu.edu.cn; Tel.: +010-58804674

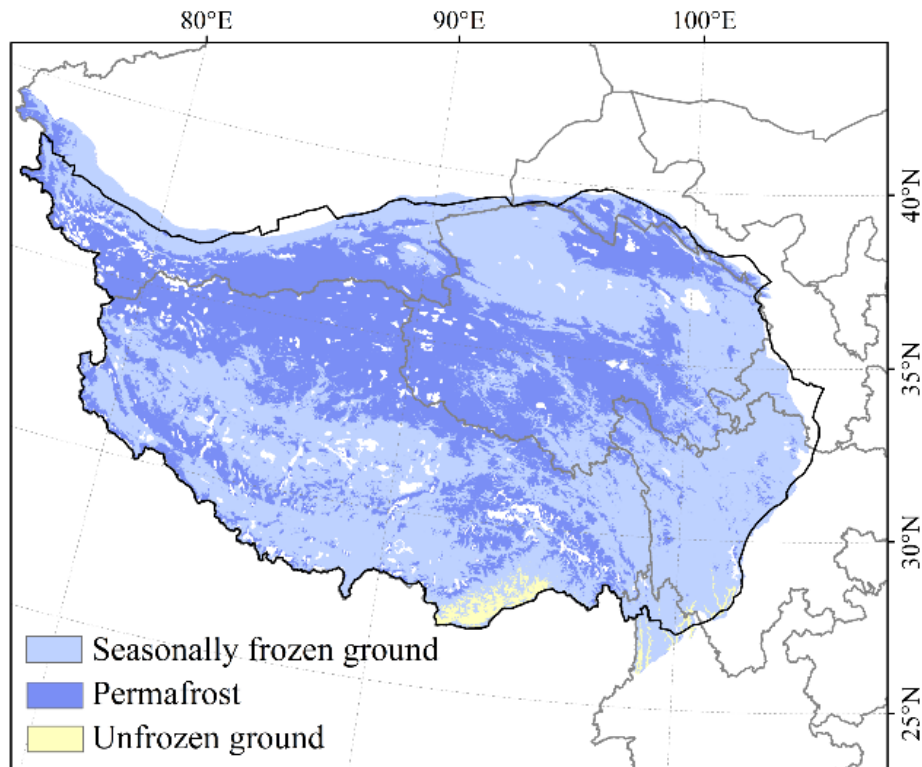

**Figure S1.** Spatial distribution of the field survey regions of the QTP.

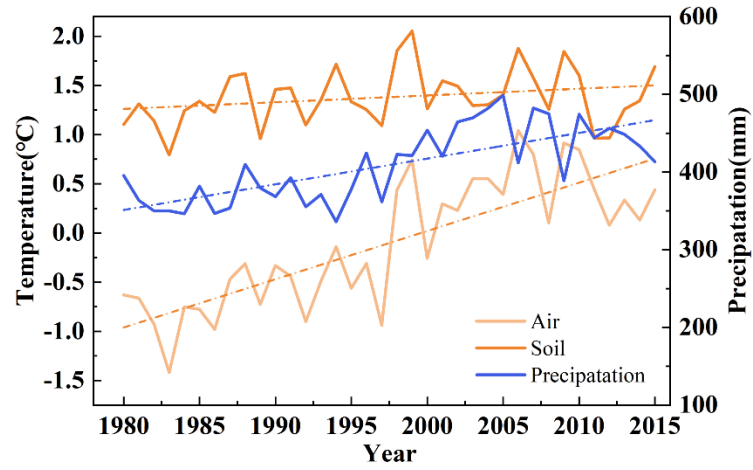

**Figure S2.** Changes of temperature and precipitation over the QTP, 1980-2015.

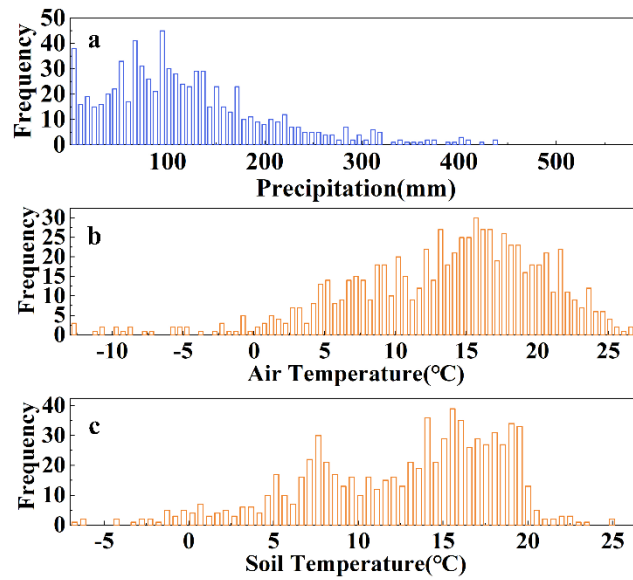

**Figure S3.** (a)precipitation, (b)air temperature and (c)soil temperature in the month when the slope geohazards occurred.

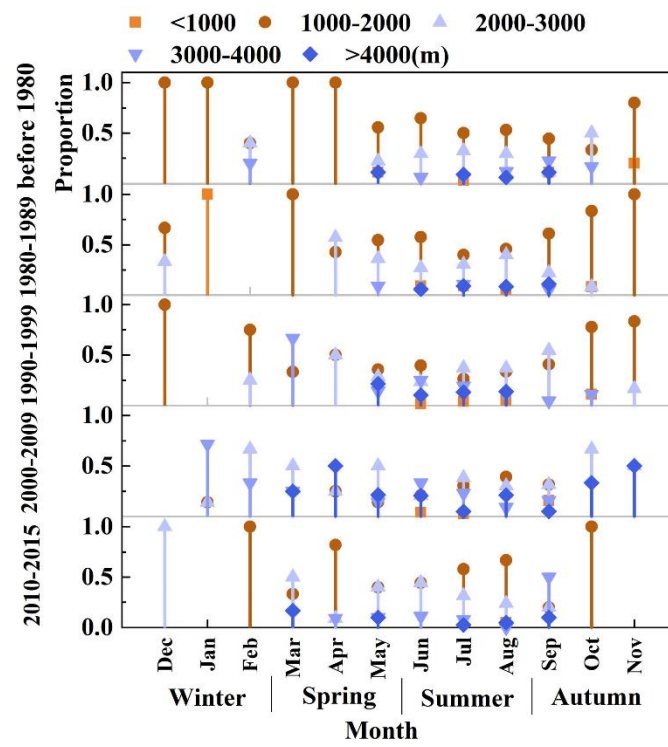

**Figure S4.** The proportion of slope geohazards occurring at different elevations in 4 periods.

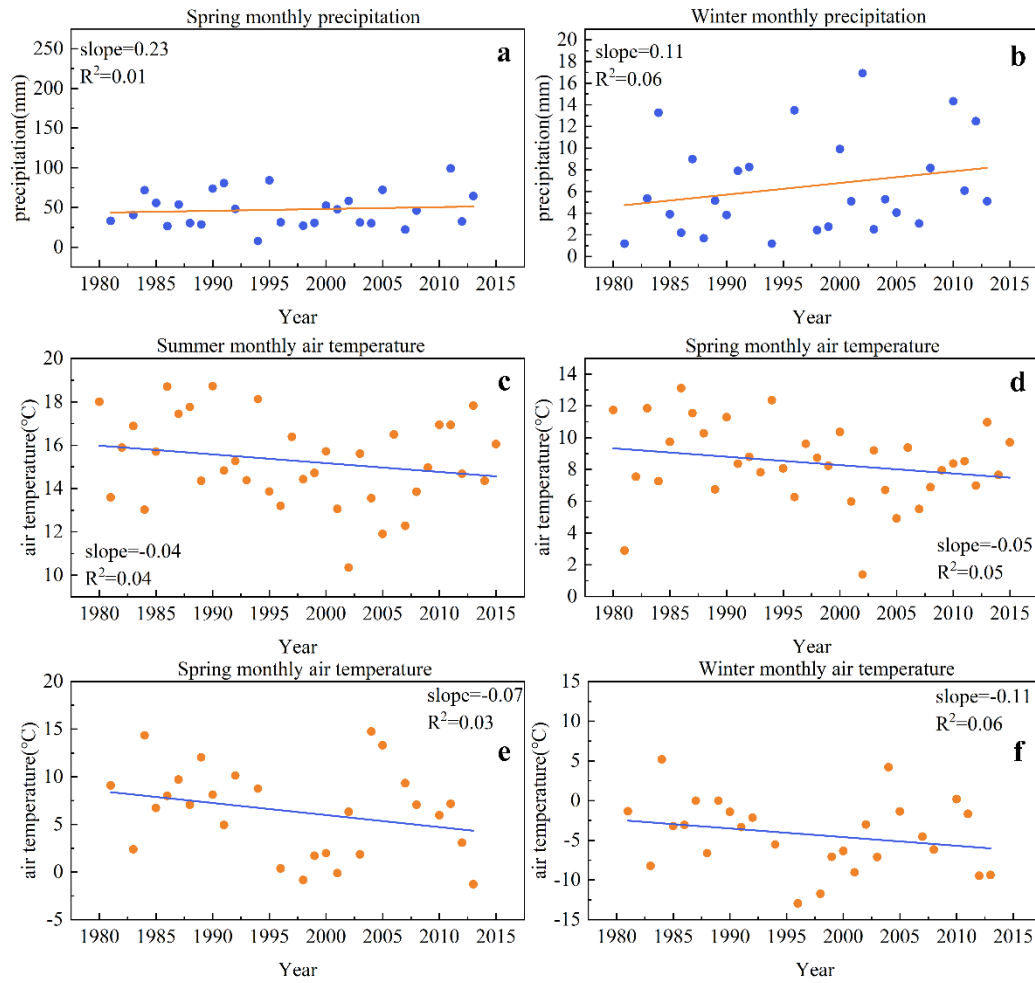

**Figure S5.** Changes of precipitation and temperature in different seasons of geohazards in different years. (a) spring monthly precipitation in the area of spring geohazards; (b) winter monthly precipitation in the area of spring geohazards; (c) summer monthly air temperature in the area of the summer geohazards; (d) spring monthly air temperature in the area of the summer geohazards; (e) spring monthly air temperature in the area of the spring geohazards; (f) winter monthly air temperature in the area of the spring geohazards.

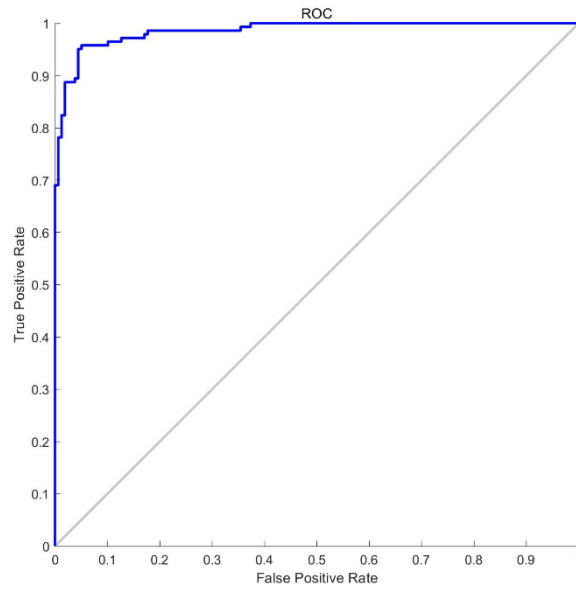

**Figure S6.** The ROC curve of the random forest model in this study.

**Table S1.** Eight CMIP5 models were used in this study.

| Model        | Institute | Country   | Resolution |
|--------------|-----------|-----------|------------|
| BCC-CSM1.1-M | BCC       | China     | 320×160    |
| MIROC5       | MIROC     | Japan     | 256×180    |
| IPSL-CM5A-MR | IPSL      | France    | 144×143    |
| ACCESS1.0    | CSIRO-BOM | Australia | 192×145    |
| MRI-CGCM3    | MRI       | Japan     | 320×160    |
| INM-CM4      | INM       | Russia    | 180×120    |
| HAD-GEM2-CC  | MOHC      | Britain   | 192×145    |
| HAD-GEM2-ES  | MOHC      | Britain   | 192×145    |
